# Supplementary material
Source: PubMed Central journal article supplement (PMC5056807)
Supplement: NIHMS794973-supplement-Supplemental_1.pdf [file NIHMS794973-supplement-Supplemental_1.pdf]

Supplementary Table 1: Dietary formulation<sup>1</sup>

| <b>Macronutrients (%)</b> | <b>Chow</b> | <b>CH</b> | <b>CH/PS</b> |
|---------------------------|-------------|-----------|--------------|
| Crude protein             | 18.9        | 18.7      | 18.2         |
| Fat                       | 7.8         | 7.7       | 7.4          |
| Carbohydrate              | 51.4        | 51.3      | 50.1         |
| Cholesterol               | -           | 0.5       | 0.5          |
| Phytosterol <sup>2</sup>  | -           | -         | 2.0          |
| Energy density (kcal/g)   | 3.52        | 3.49      | 3.39         |
| % kcal from:              |             |           |              |
| Protein                   | 21.4        | 21.4      | 21.4         |
| Fat (% kcal)              | 20.1        | 19.8      | 19.6         |
| Carbohydrate (% kcal)     | 58.5        | 58.7      | 58.9         |

<sup>1</sup>Ingredients (in descending order of inclusion) - Ground wheat, ground corn, corn gluten meal, wheat middlings, soybean oil, calcium carbonate, dicalcium phosphate, brewers dried yeast, L-lysine, iodized salt, magnesium oxide, choline chloride, DL-methionine, calcium propionate, L-tryptophan, vitamin E acetate, menadione sodium bisulfite complex (source of vitamin K activity), manganous oxide, ferrous sulfate, zinc oxide, niacin, calcium pantothenate, copper sulfate, pyridoxine hydrochloride, riboflavin, thiamin mononitrate, vitamin A acetate, calcium iodate, vitamin B12 supplement, folic acid, biotin, vitamin D3 supplement, cobalt carbonate.

<sup>2</sup>Reducol (Forbs Medi-Tech Corp, Kearny, NJ): total sterol content >97% composed predominately of sitosterol (~80%) and sitostanol (15-35%), with minor amounts of campesterol (<40%), and stigmasterol (<30%).
